# Supplementary material for: Neonatal pneumococcal colonisation caused by Influenza A infection alters lung function in adult mice
Source: PubMed Central journal article supplement (PMC4778168; doi:10.1038/srep22751), 2016-03-04
Supplement: srep22751-s1.pdf [file srep22751-s1.pdf]

## **Supplementary information**

### **Neonatal pneumococcal colonisation caused by Influenza A infection alters lung function in adult mice.**

Meaghan FitzPatrick<sup>2</sup>, Simon G. Royce<sup>5</sup>, Shenna Langenbach<sup>2</sup>, Jonathan McQualter<sup>2</sup>, Patrick C. Reading<sup>3</sup>, Odilia Wijburg<sup>4</sup>, Gary P. Anderson<sup>2</sup>, Alastair Stewart<sup>2</sup>, Jane Bourke<sup>2,5</sup>, Steven Bozinovski<sup>1,2,\*</sup>

## **Supplementary methods**

### **Flow cytometric analysis of lung epithelial cells**

Single lung cells were isolated by disaggregation of lung tissue by collagenase digestion (Liberase TM; Roche; 1 Wunsch U/3mL Hank's buffered saline solution (HBSS)/lung for 45 min at 37°C with agitation) followed by hypotonic lysis of red blood cells (10mM KHCO<sub>3</sub>, 150mM NH<sub>4</sub>Cl, 0.1mM EDTA Na<sub>2</sub> for 90 sec at RT). Single cells were then resuspended at 5 x 10<sup>7</sup> cells/mL in HBSS plus 2% (v/v) fetal bovine serum (FBS; Invitrogen) containing a cocktail of antibodies (anti-CD45, anti-CD31, anti-EpCAM, anti-MHCII) and relevant isotype controls (Biolegend). Labeled cells were washed in HBSS-2% FBS, resuspended at 1 x 10<sup>7</sup> cells/mL and held on ice for flow cytometric analysis. Viability was determined by propidium iodide (PI; 1 µg/mL) staining, and doublets excluded by forward/side scatter (height) vs. forward/side scatter (width) gating. Type II alveolar (AT2) cells were identified by the phenotype CD45<sup>-</sup> CD31<sup>-</sup> EpCAM<sup>+</sup> MHCII<sup>+</sup>.

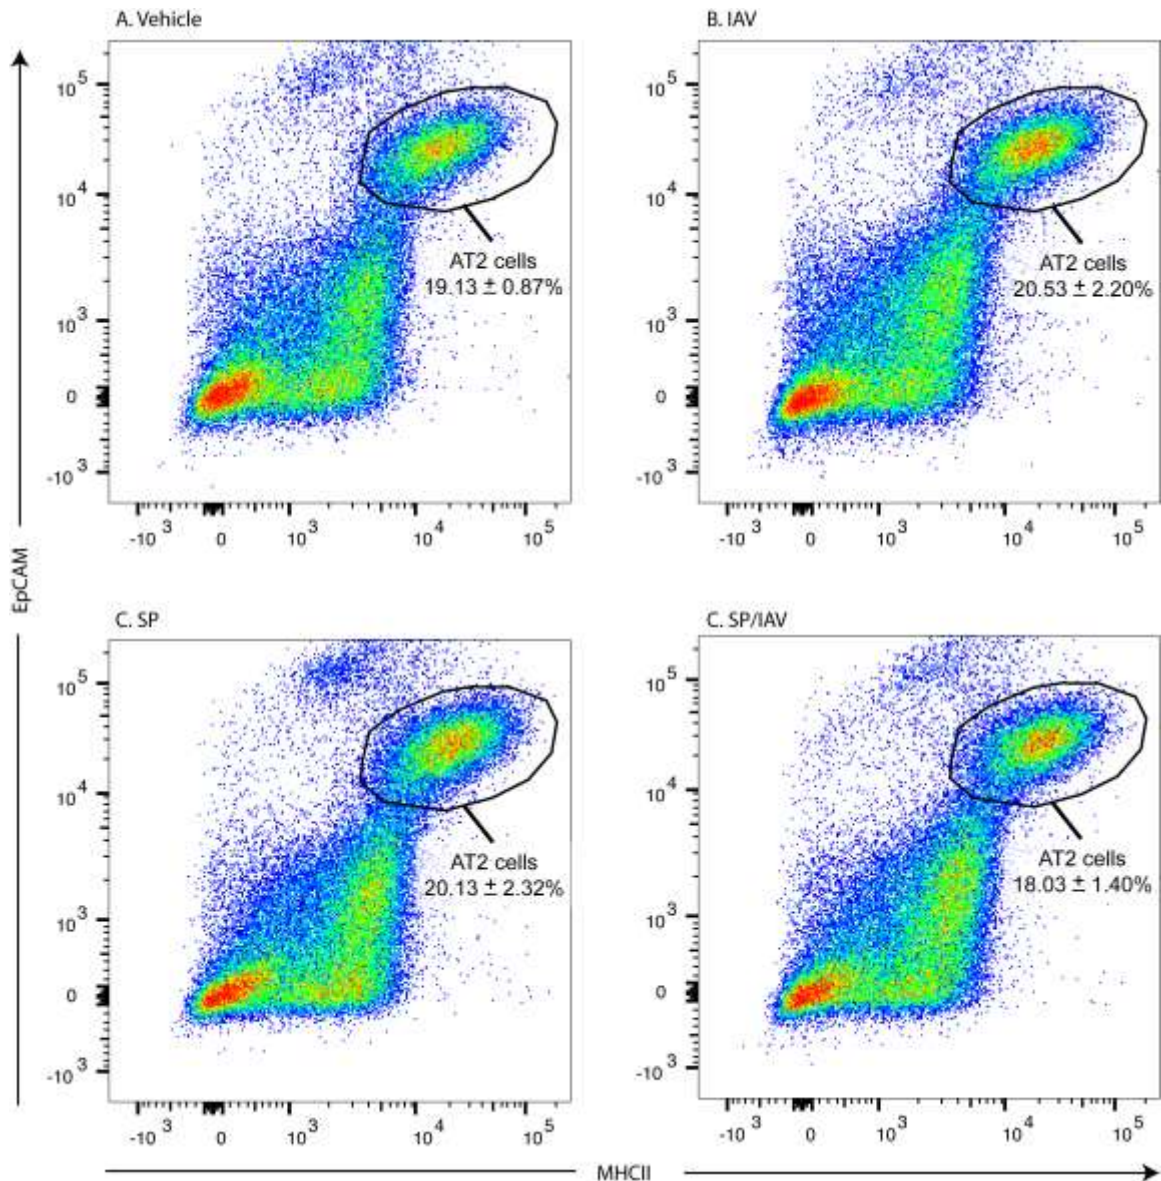

**Figure S1. The relative abundance of At2 cells does not alter between groups.** Representative images of FACS plots of viable, non-hematopoietic ( $CD45^-$ ), non-endothelial ( $CD31^-$ ) cells from PBS vehicle (A), IAV (B), SP (C) and SP/IAV treated (D) mice shows no difference in the relative abundance of  $EpCAM^+ MHCII^+$  AT2 cells between groups. Quantification is shown as mean  $\pm$  sem (n=3).

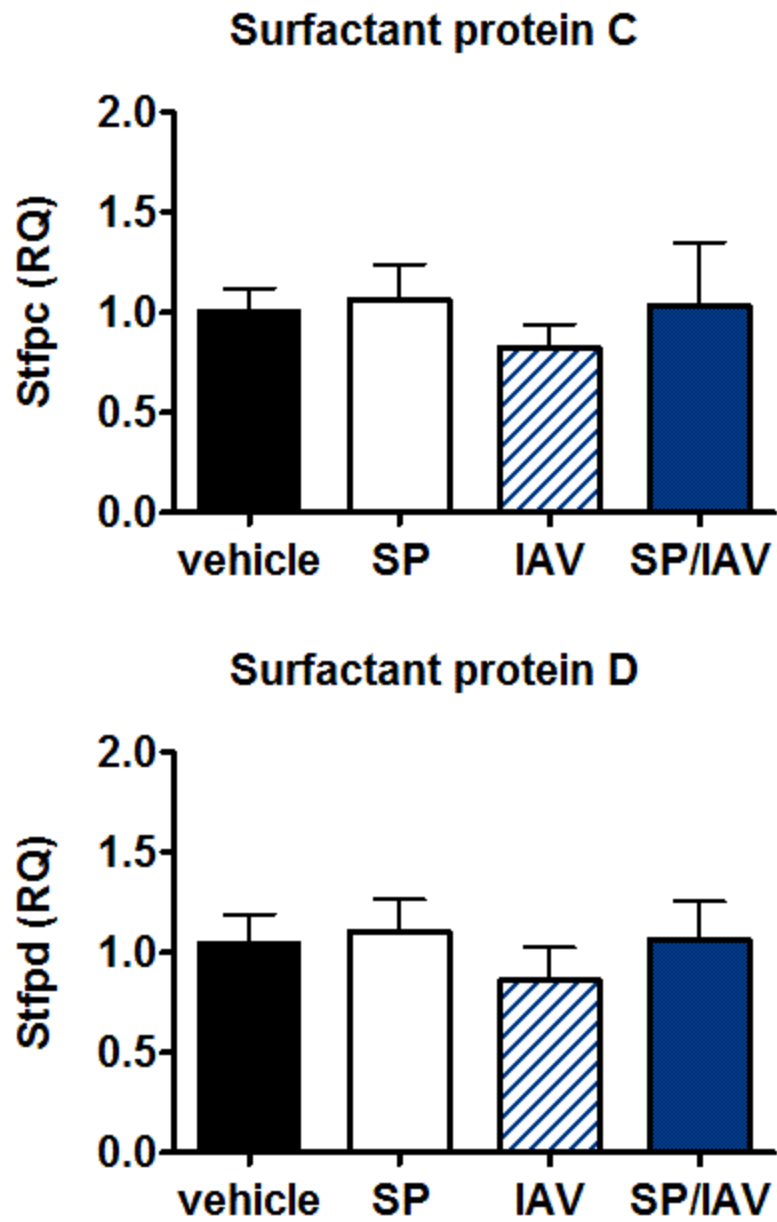

**Figure S2. Neonatal co-infection does not alter surfactant protein gene expression in adult lung** Taqman PCR analysis for gene expression of surfactant protein C and D in lung tissue is expressed as fold-change compared to vehicle-treated control and normalised to GAPDH housekeeping gene (n = 6).
